# Supplementary material
Source: Research Square preprint supplement (doi:10.21203/rs.3.rs-9993738/v1)
Supplement: Supplementary file 1 [file 9d4ef85423d88469ee270e61.pdf]

# Magnitude of biome shifts over the last 21,000 years reveals the impact of seasonality and intense warming on future vegetation

## Supplementary information

**Authors:** Chenzhi Li<sup>1,2</sup>, Anne Dallmeyer<sup>3\*</sup>, Ulrike Herzschuh<sup>1,2,4\*</sup>

### 5 **Affiliations:**

<sup>1</sup> Polar Terrestrial Environmental Systems, Alfred Wegener Institute Helmholtz Centre for Polar and Marine Research, Telegrafenberg A45, 14473 Potsdam, Germany

<sup>2</sup> Institute of Environmental Science and Geography, University of Potsdam, Karl-Liebknecht-Straße 24-25, 14476 Potsdam, Germany

10 <sup>3</sup> Max Planck Institute for Meteorology, Bundesstraße 53, 20146 Hamburg, Germany

<sup>4</sup> Institute of Biochemistry and Biology, University of Potsdam, Karl-Liebknecht-Straße 24-25, 14476 Potsdam, Germany

**\*Correspondence to:** Ulrike Herzschuh (Ulrike.Herzschuh@awi.de); Anne Dallmeyer (anne.dallmeyer@mpimet.mpg.de)

15

**Supplementary Tables:**

**Supplementary Table 1: Mean magnitude of biome shifts at 2,250 C.E. relative to pre-industrial (0.1 cal. ka BP) in the Northern Hemisphere.** Group means represent the average values across all biomes within each biome group.

20

| <b>Biome group</b> | <b>Biome</b>                  | <b>Number of grid-cells</b> | <b>Mean magnitude</b> |
|--------------------|-------------------------------|-----------------------------|-----------------------|
| <b>Forest</b>      | Tropical forest               | 62                          | 0.00                  |
|                    | Subtropical forest            | 26                          | 0.46                  |
|                    | Temperate forest              | 148                         | 1.55                  |
|                    | Boreal forest                 | 173                         | 1.31                  |
|                    | <i>Group mean</i>             |                             | 0.83                  |
| <b>Non-forest</b>  | Warm savanna and dry woodland | 13                          | 1.69                  |
|                    | Grassland and dry shrubland   | 136                         | 0.97                  |
|                    | Warm desert                   | 128                         | 1.40                  |
|                    | Tundra and polar desert       | 145                         | 1.96                  |
|                    | <i>Group mean</i>             |                             | 1.50                  |

25 **Supplementary Table 2: Proportion and magnitude of biome shifts at 2,250 C.E. relative to pre-industrial (0.1 cal. ka BP) in the Northern Hemisphere, by contingency class.** Contingency classes are defined based on combinations of bioclimatic seasonality and the rate of change in growing season temperature (see Fig. 4). The proportion of biome shifts is calculated as the number of grid-cells that undergo biome shifts divided by the total number of grid-cells in that class in the MPI-ESM simulation. The mean magnitude of biome shifts is the average shift magnitude (scale 0–4) for all grid-cells within each class.

| Contingency class | Number of grid-cells | Proportion of biome shifts | Mean magnitude of biome shift |
|-------------------|----------------------|----------------------------|-------------------------------|
| 1                 | –                    | –                          | –                             |
| 2                 | 55                   | 0.35                       | 0.49                          |
| 3                 | 66                   | 0.70                       | 0.91                          |
| 4                 | 98                   | 0.94                       | 1.58                          |
| 5                 | –                    | –                          | –                             |
| 6                 | 33                   | 0.64                       | 1.09                          |
| 7                 | 56                   | 0.80                       | 1.18                          |
| 8                 | 128                  | 0.95                       | 1.44                          |
| 9                 | –                    | –                          | –                             |
| 10                | 27                   | 0.81                       | 2.00                          |
| 11                | 45                   | 0.62                       | 1.02                          |
| 12                | 124                  | 0.93                       | 1.66                          |
| 13                | NA                   | NA                         | NA                            |
| 14                | 40                   | 0.92                       | 2.45                          |
| 15                | 64                   | 0.64                       | 0.95                          |

**Supplementary Table 3: Agreement of modern potential natural biomes with the pollen-based reconstructions and ESM-based simulations at 0 cal. ka BP globally.** The spatial resolution of the modern potential natural biomes is 5 arc minutes for the reconstruction and 3.75 degrees for the simulation (Supplementary Data 7).

| <b>Biome</b>                  | <b>Pollen-based reconstruction</b> |               | <b>ESM-based simulation</b> |               |
|-------------------------------|------------------------------------|---------------|-----------------------------|---------------|
|                               | Number of records                  | Agreement (%) | Number of records           | Agreement (%) |
|                               | (5 arc minutes)                    |               | (3.75 degrees)              |               |
| Tropical forest               | 112                                | 83.04         | 105                         | 72.38         |
| Subtropical forest            | 61                                 | 77.05         | 1                           | 0.00          |
| Temperate forest              | 1,254                              | 86.76         | 1,332                       | 77.33         |
| Boreal forest                 | 454                                | 79.30         | 354                         | 53.67         |
| Warm savanna and dry woodland | 54                                 | 75.93         | 62                          | 6.45          |
| Grassland and dry shrubland   | 163                                | 52.76         | 276                         | 38.04         |
| Warm desert                   | 22                                 | 72.73         | 24                          | 62.50         |
| Tundra and polar desert       | 117                                | 52.99         | 83                          | 59.04         |
| <b>Total</b>                  | <b>2,237</b>                       | <b>80.15</b>  | <b>2,237</b>                | <b>65.67</b>  |

**Supplementary Table 4: Number and proportion of grid-cells classified as modern potential natural biome in the Northern Hemisphere.**

| <b>Biome</b>                  | <b>Number of grid-cells<br/>(5 arc minutes)</b> | <b>Proportion (%)</b> |
|-------------------------------|-------------------------------------------------|-----------------------|
| Tropical forest               | 125,724                                         | 7.84                  |
| Subtropical forest            | 25,317                                          | 1.58                  |
| Temperate forest              | 348,355                                         | 21.72                 |
| Boreal forest                 | 364,014                                         | 22.69                 |
| Warm savanna and dry woodland | 94,263                                          | 5.88                  |
| Grassland and dry shrubland   | 280,930                                         | 17.51                 |
| Warm desert                   | 192,053                                         | 11.97                 |
| Tundra and polar desert       | 173,448                                         | 10.81                 |
| <b>Total</b>                  | <b>1,604,104</b>                                | <b>100.00</b>         |

**Supplementary Table 5: Distance matrix of biome shifts used in this study.** Higher values indicate a greater magnitude of shift in vegetation structure or bioclimatic zone affinity between biome types.

| From \ To                     | Tropical forest | Subtropical forest | Temperate forest | Boreal forest | Warm savanna and dry woodland | Grassland and dry shrubland | Warm desert | Tundra and polar desert |
|-------------------------------|-----------------|--------------------|------------------|---------------|-------------------------------|-----------------------------|-------------|-------------------------|
| Tropical forest               | 0               | 1                  | 2                | 3             | 1                             | 2                           | 3           | 4                       |
| Subtropical forest            | 1               | 0                  | 1                | 2             | 2                             | 2                           | 3           | 3                       |
| Temperate forest              | 2               | 1                  | 0                | 1             | 3                             | 2                           | 3           | 2                       |
| Boreal forest                 | 3               | 2                  | 1                | 0             | 4                             | 3                           | 2           | 1                       |
| Warm savanna and dry woodland | 1               | 2                  | 3                | 4             | 0                             | 1                           | 2           | 4                       |
| Grassland and dry shrubland   | 2               | 2                  | 2                | 3             | 1                             | 0                           | 1           | 1                       |
| Warm desert                   | 3               | 3                  | 3                | 2             | 2                             | 1                           | 0           | 1                       |
| Tundra and polar desert       | 4               | 3                  | 2                | 1             | 4                             | 1                           | 1           | 0                       |

45 **Supplementary Figures:**

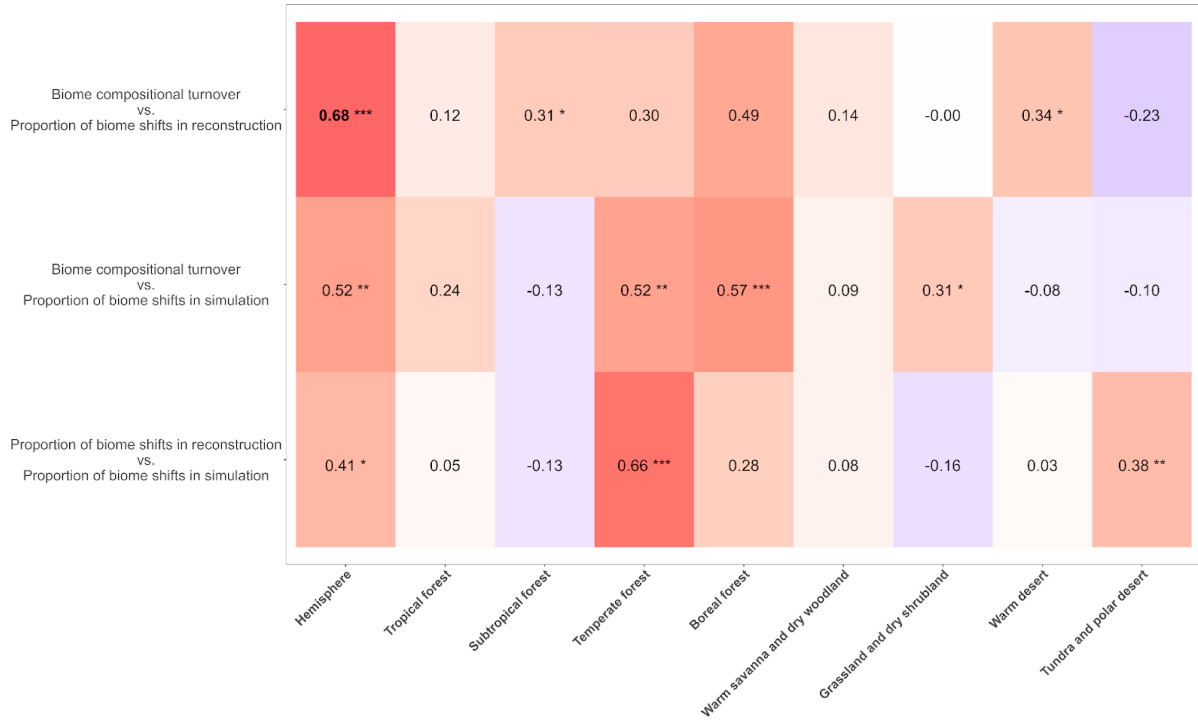

**Supplementary Fig. 1: Gaussian kernel correlations between compositional turnover and the proportion of biome shifts over the last 21,000 years in the Northern Hemisphere, stratified by modern potential natural biome distributions.** Statistically significant correlations are denoted by one ( $p < 0.05$ ), two ( $p < 0.01$ ), or three asterisks ( $p < 0.001$ ).

50

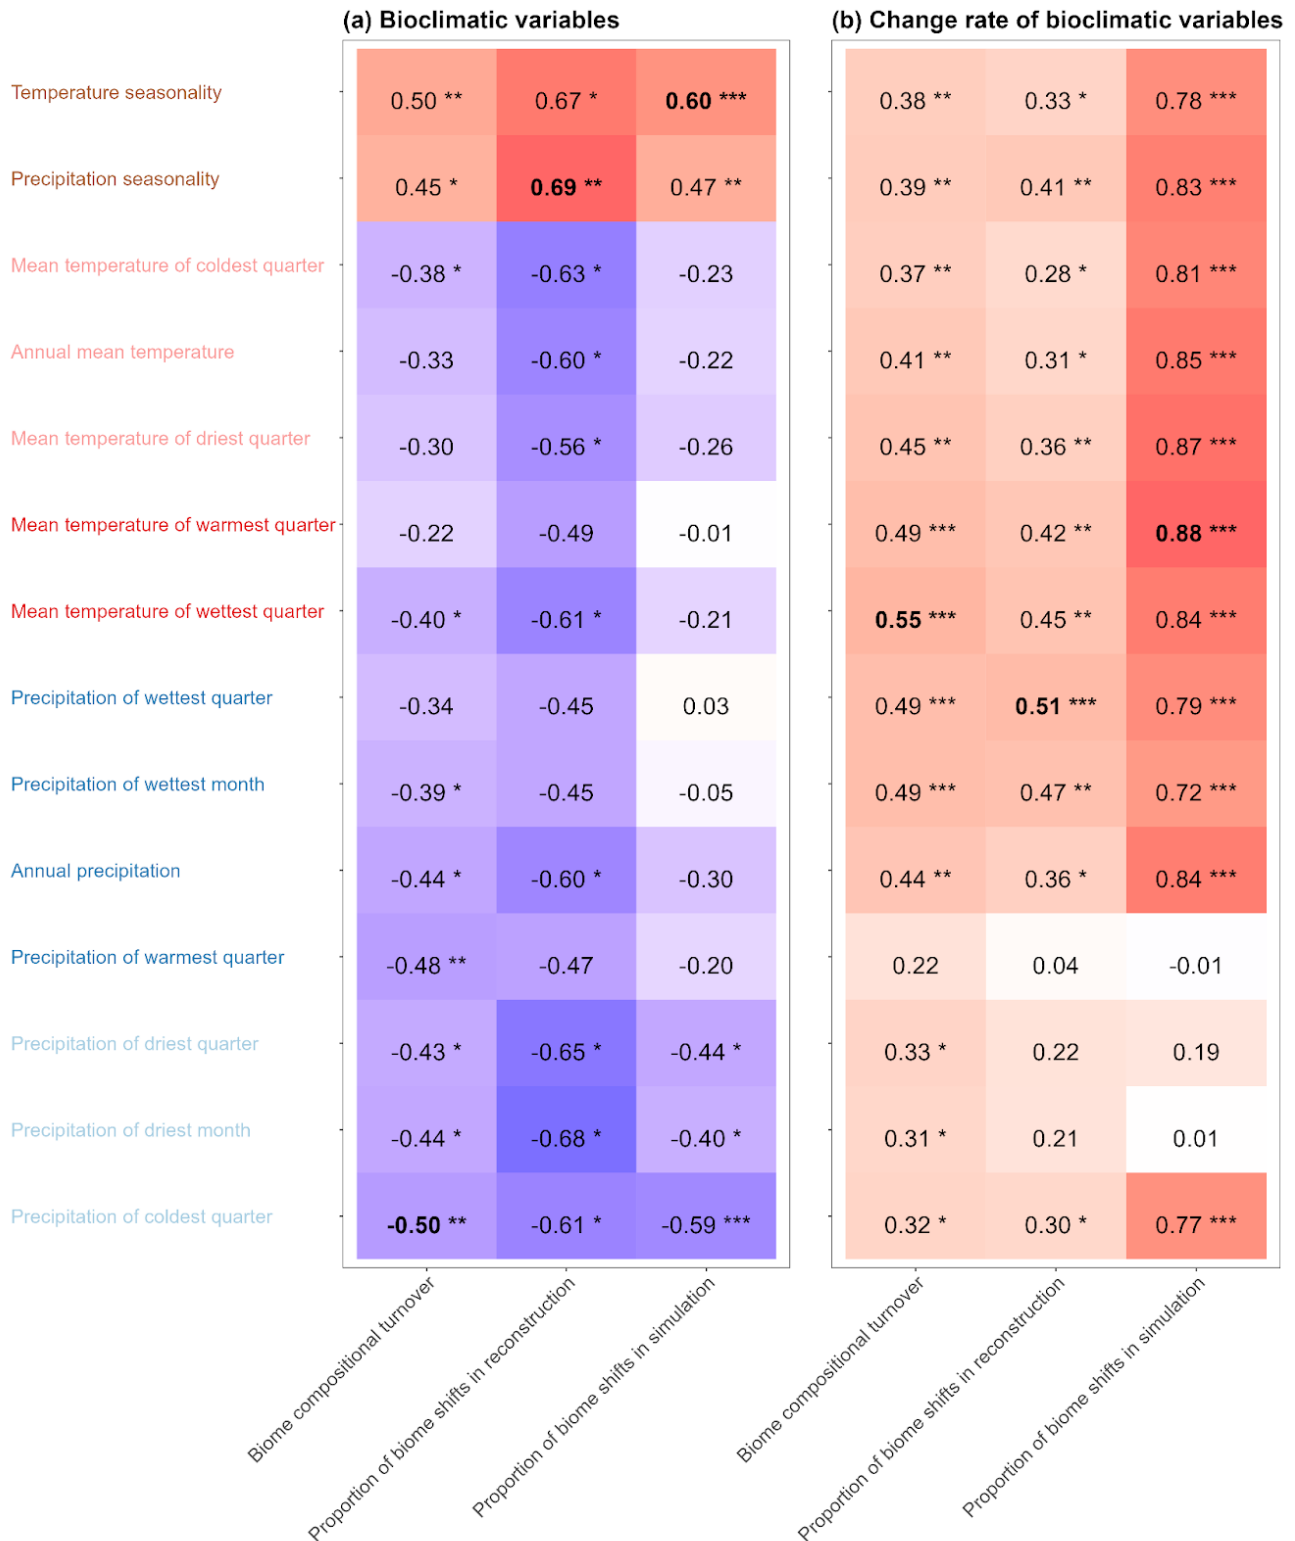

**Supplementary Fig. 2: Gaussian kernel correlation coefficients between compositional turnover and the proportion of biome shifts with simulated bioclimatic variables and their rates of change over the last 21,000 years in the Northern Hemisphere.** Statistical significance is indicated by one ( $p < 0.05$ ), two ( $p < 0.01$ ), or three asterisks ( $p < 0.001$ ).

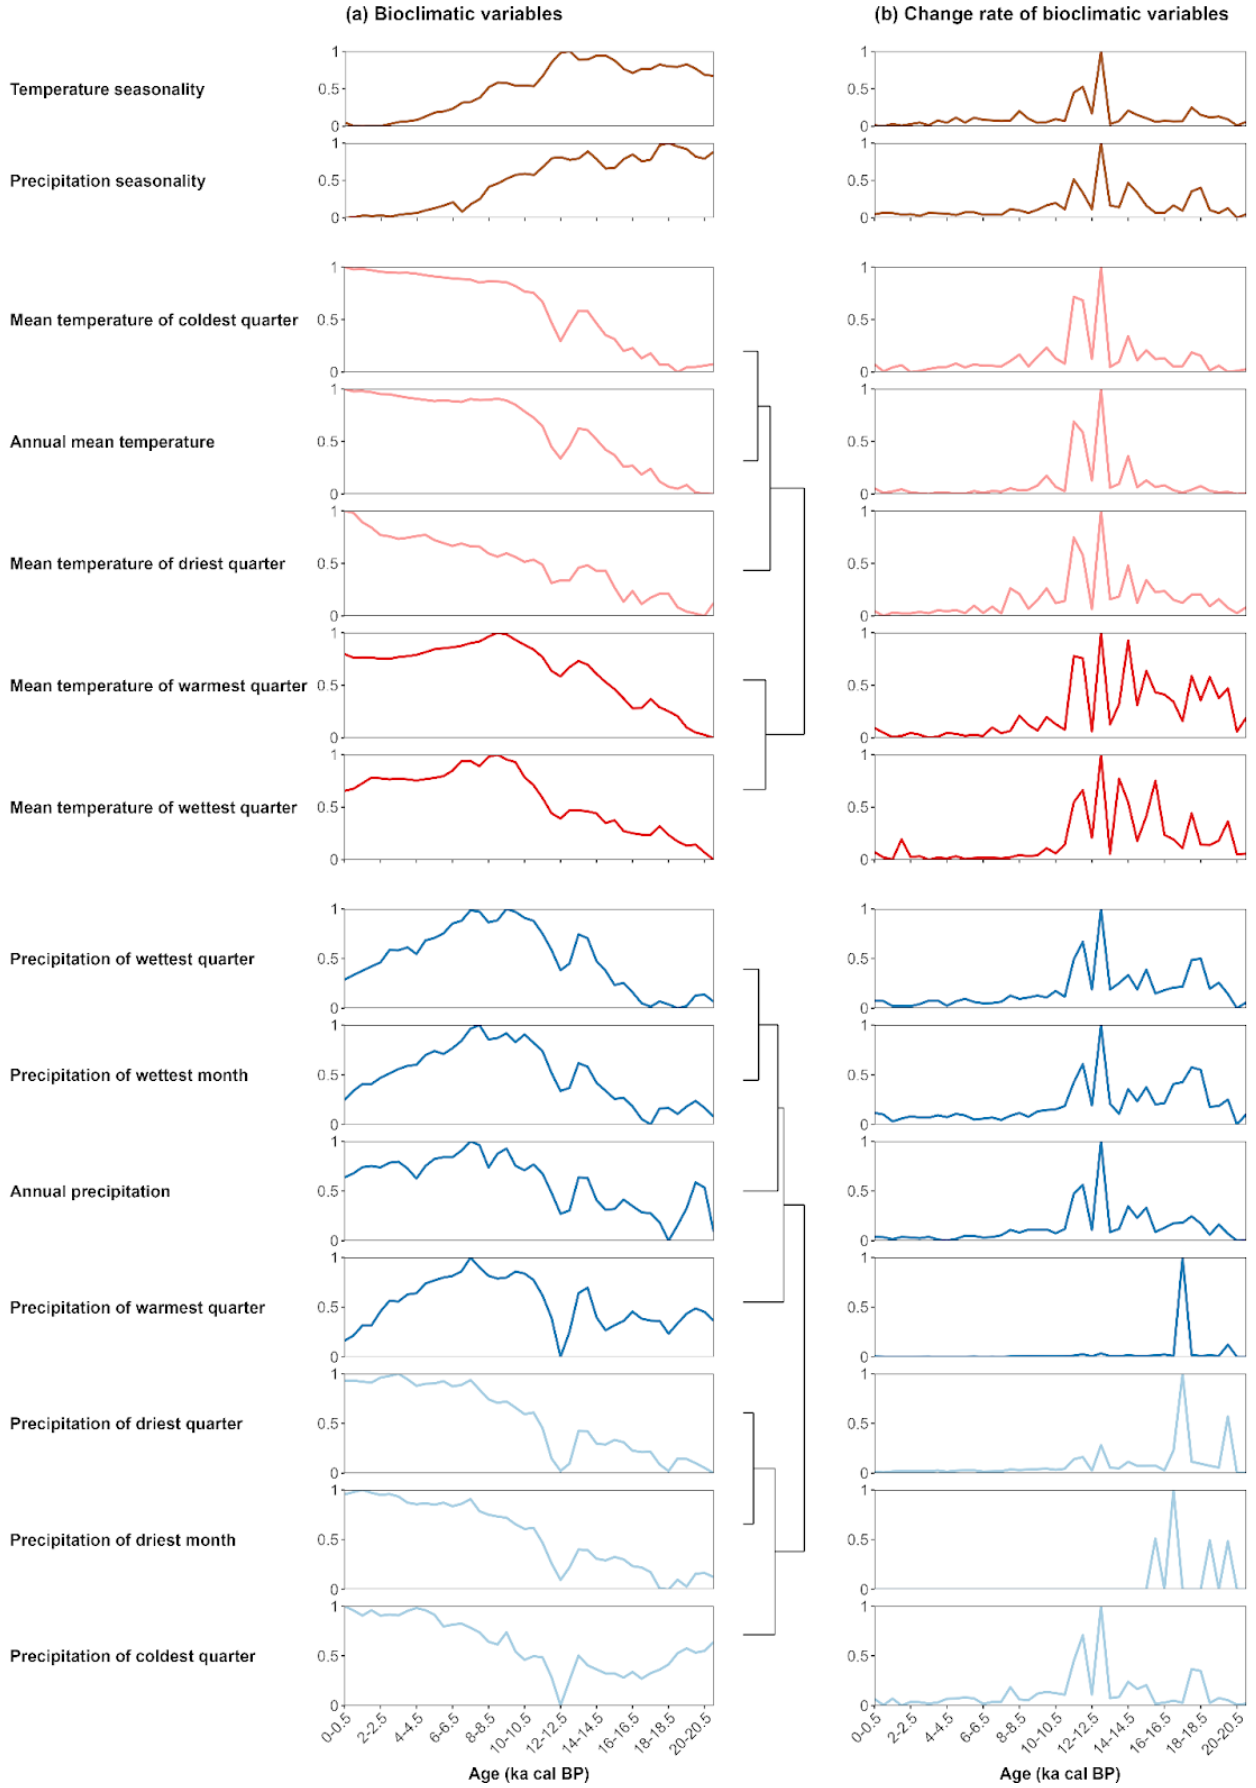

**Supplementary Fig. 3: Temporal dynamics of simulated bioclimatic variables and their rates of change over the last 21,000 years in the Northern Hemisphere.** Bioclimatic variables are defined following O'Donnell and Ignizio<sup>1</sup>, and clustered hierarchically based on normalized time series. For each timeslice, hemispheric values are calculated as the weighted sum of biome-level values, with weights corresponding to the proportion of each biome in the modern potential natural biome distribution (see Supplementary Table 4). Variable values at each timeslice represent medians between adjacent timeslices, while rates of change represent relative changes between consecutive timeslices. All time series are normalized to a 0–1 scale.

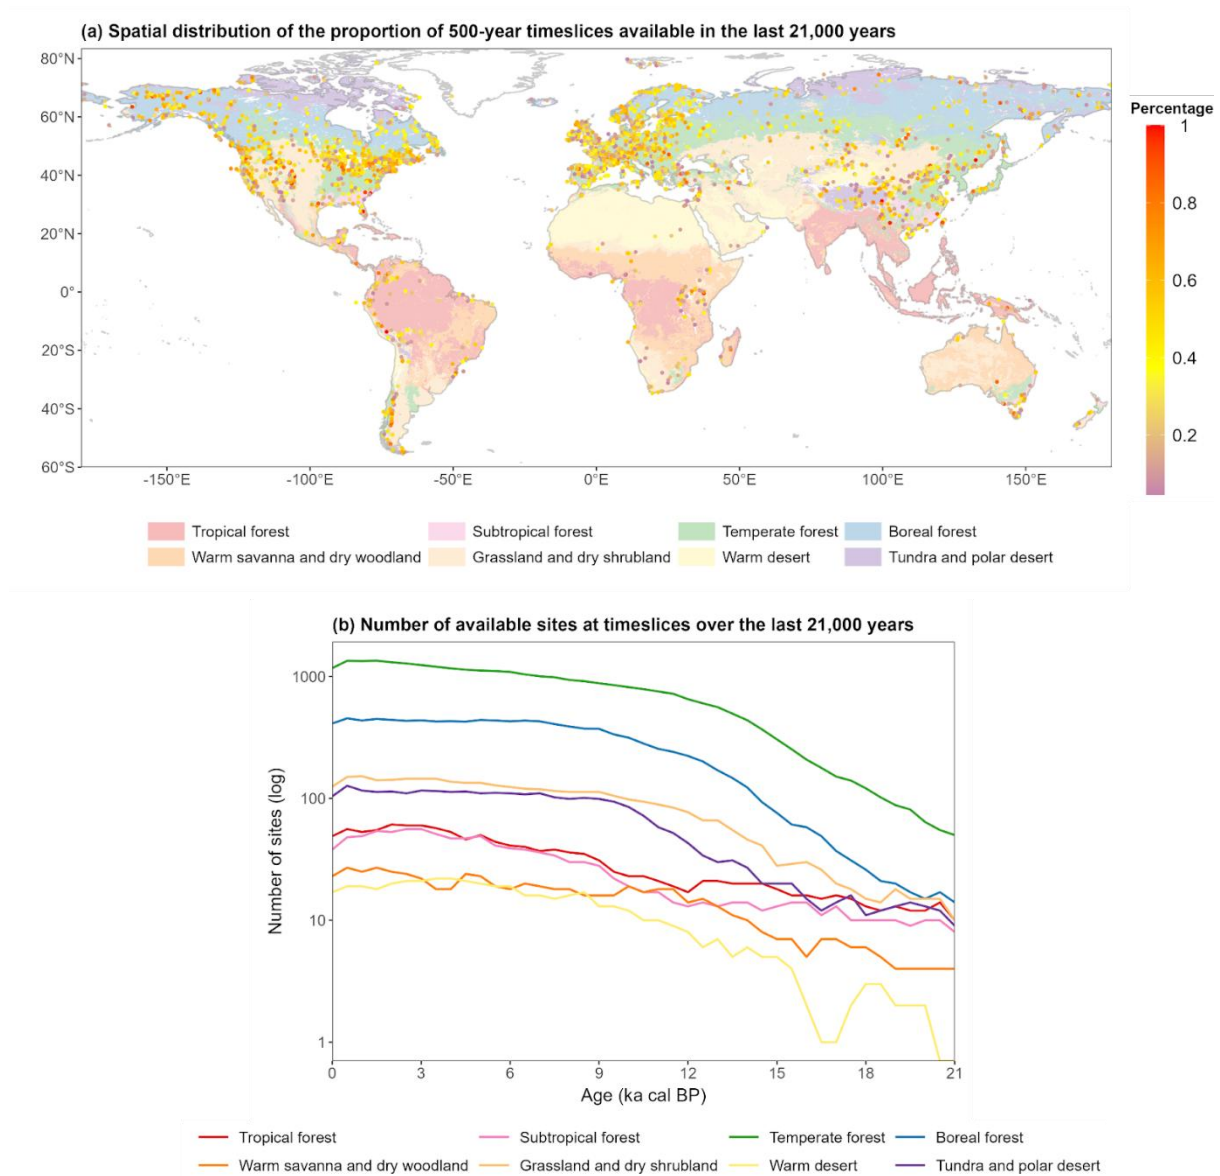

65

**Supplementary Fig. 4: Record density of pollen-based biome reconstructions over the last 21,000 years.**

**(a)** Spatial distribution of the proportion of 500-year timeslices available for each site globally. The background map shows modern potential natural biome distributions, aggregated from modern potential natural vegetation at 5-arcminute resolution<sup>2,3</sup>. **(b)** Number of available sites at each timeslice over the past 21,000 years in the Northern Hemisphere, grouped by modern potential natural biome. The y-axis is shown on a logarithmic scale.

70

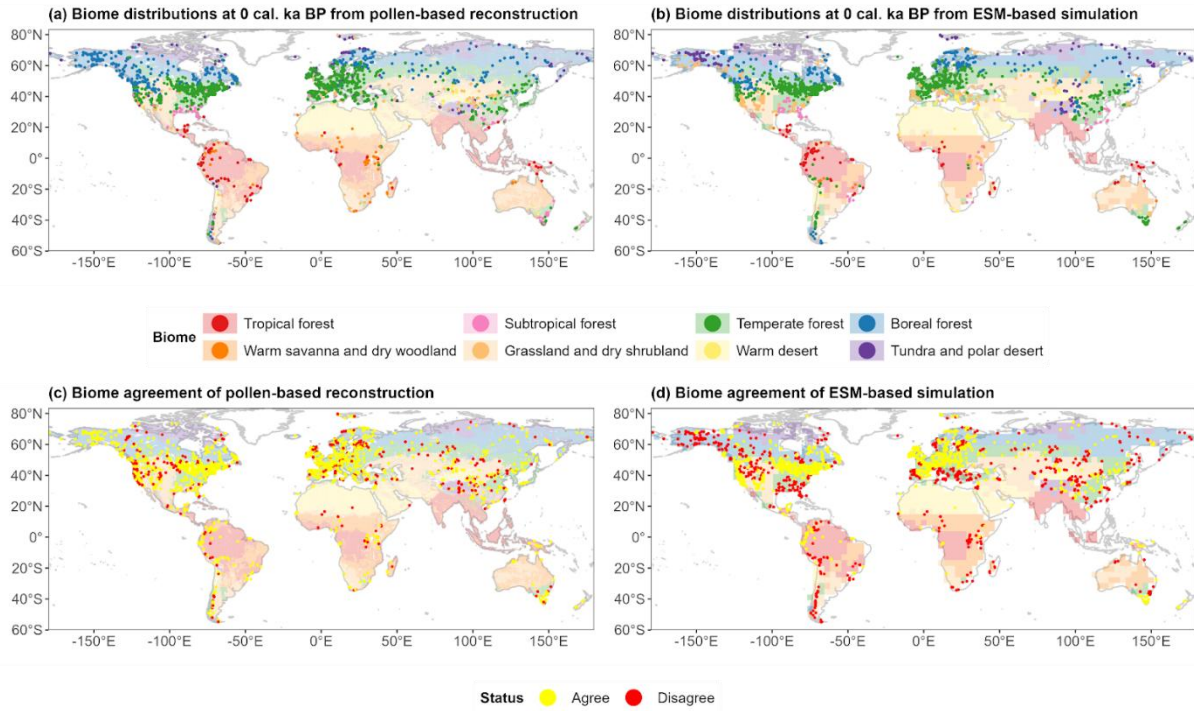

75 **Supplementary Fig. 5: Spatial distribution of biomes at 0 cal. ka BP and their agreement with modern potential natural biomes.** Maps are derived from pollen-based biome reconstructions and ESM-based simulations. The background shows modern potential natural biomes aggregated from modern potential natural vegetation. Spatial resolution is 5 arc minutes for the pollen-based reconstruction and 3.75° for the simulation.

### Supplementary References:

- 80 1. O'Donnell, M. S. & Ignizio, D. A. Bioclimatic predictors for supporting ecological applications in the  
conterminous United States. *U.S. Geological Survey Data Series* **691**, 1–10 (2012).
2. Ramankutty, N. *et al.* ISLSCP II Potential Natural Vegetation Cover. ORNL DAAC, Oak Ridge, Tennessee,  
USA. <https://doi.org/10.3334/ORNLDAAC/961> (2010).
3. Dallmeyer, A., Claussen, M. & Brovkin, V. Harmonising plant functional type distributions for evaluating  
85 Earth system models. *Clim. Past* **15**, 335–366 (2019).
